# Supplementary material
Source: PubMed Central journal article supplement (PMC11114907)
Supplement: 18_2010_519_MOESM1_ESM.pdf [file 18_2010_519_MOESM1_ESM.pdf]

**Table S1.** Frequent intramolecular communication paths in the wild type trajectory.

| # <sup>a</sup> | Path <sup>b</sup>                                       | Rnk <sup>c</sup> | Frq <sup>d</sup> | Len <sup>e</sup> | Crr <sup>f</sup> | Scr <sup>g</sup> |
|----------------|---------------------------------------------------------|------------------|------------------|------------------|------------------|------------------|
| 1              | M582-Y612*-M408*- <u>S616-D405*</u> -N377*-S402         | 15               | 44.55            | 5                | 5                | 1.00             |
| 2              | M582-Y612*-N615*-N619*-D405*-N377*-S402                 | 18               | 41.37            | 5                | 5                | 1.00             |
| 3              | M582-Y612*-N615*-N619*-D405*-N377*- <b>P620</b>         | 19               | 39.05            | 5                | 5                | 1.00             |
| 4              | Y612*-M408*- <u>S616-D405*</u> -N377*-S402-L381         | 33               | 34.29            | 5                | 5                | 1.00             |
| 5              | M582-Y612*-M408*- <u>S616-D405*</u> -N377*- <b>P620</b> | 34               | 33.88            | 5                | 5                | 1.00             |
| 6              | Y612*-N615*-N619*-D405*-N377*-S402-L381                 | 35               | 33.10            | 5                | 5                | 1.00             |
| 7              | I585-Y612*-M408*- <u>S616-D405*</u> -N377*-S402         | 41               | 32.39            | 5                | 5                | 1.00             |
| 8              | M582-Y612*-M408*- <u>S616-D405*</u> -N377*-S402-L381    | 42               | 32.19            | 6                | 6                | 1.00             |
| 9              | S586-M582-Y612*-M408*- <u>S616-D405*</u> -N377*         | 52               | 31.27            | 5                | 5                | 1.00             |
| 10             | M582-Y612*-N615*-N619*-D405*-N377*-S402-L381            | 54               | 31.04            | 6                | 6                | 1.00             |
| 11             | Y612*-N615*-N619*-D405*-N377*-S402-V380                 | 58               | 30.48            | 5                | 5                | 1.00             |

<sup>a</sup>Path number. <sup>b</sup>Communication paths occurring in  $\geq 30\%$  of the trajectory frames and characterized by a length  $\geq 5$ . The asterisk marks the amino acids that behave as hubs in more than 30% of the trajectory frames; bold and underlined labels refer, respectively, to highly conserved and spontaneously occurring mutation sites. <sup>c</sup>Rank number within the entire set of saved paths, i.e., those characterized by frequency  $\geq 10\%$  and length  $\geq 3$ . <sup>d</sup>Path frequencies (%), i.e., number of frames holding the path divided by the trajectory frames (i.e., 10000). <sup>e</sup>Path length: number of amino acids, excluding the extremes, which participate in the path. <sup>f</sup>Number of amino acids in the paths characterized by correlated motions with at least one of the two extremes. <sup>g</sup>Correlation score, i.e. ratio between number of correlated amino acids (row #6) and path length (row #5).

**Table S2.** Frequent intramolecular communication paths in the D564<sup>(6.30)</sup>G trajectory.

| # <sup>a</sup> | Path <sup>b</sup>                                    | Rnk <sup>c</sup> | Frq <sup>d</sup> | Len <sup>e</sup> | Crr <sup>f</sup> | Scr <sup>g</sup> |
|----------------|------------------------------------------------------|------------------|------------------|------------------|------------------|------------------|
| 1              | F515-Y612*-M408*-S616-D405*-N377-P620                | 9                | 75.13            | 5                | 5                | 1.00             |
| 2              | F515-Y612*-M408*-S616-D405*-N619*-L457*              | 10               | 69.66            | 5                | 5                | 1.00             |
| 3              | Y612*-M408*-S616-D405*-N377-P620-V380                | 12               | 66.06            | 5                | 5                | 1.00             |
| 4              | F515-Y612*-M408*-S616-D405*-N377-P620-V380           | 13               | 59.97            | 6                | 6                | 1.00             |
| 5              | L608-F515-Y612*-M408*-S616-D405*-N619*               | 22               | 48.13            | 5                | 5                | 1.00             |
| 6              | T446-M408*-S616-D405*-N377-P620-V380                 | 23               | 47.84            | 5                | 5                | 1.00             |
| 7              | L608-F515-Y612*-M408*-S616-D405*-N377                | 24               | 47.55            | 5                | 5                | 1.00             |
| 8              | L608-F515-Y612*-M408*-S616-D405*-N377-P620           | 25               | 47.20            | 6                | 6                | 1.00             |
| 9              | L608-F515-Y612*-M408*-S616-D405*-N619*-L457*         | 28               | 43.72            | 6                | 6                | 1.00             |
| 10             | L608-F515-Y612*-M408*-S616-D405*-S453                | 29               | 43.28            | 5                | 5                | 1.00             |
| 11             | P584-L608-F515-Y612*-M408*-S616-D405*                | 31               | 41.56            | 5                | 4                | 0.80             |
| 12             | P584-L608-F515-Y612*-M408*-S616-D405*-N377           | 32               | 41.07            | 6                | 5                | 0.83             |
| 13             | P584-L608-F515-Y612*-M408*-S616-D405*-N377-P620      | 34               | 40.75            | 7                | 6                | 0.86             |
| 14             | Y612*-M408*-S616-D405*-L401*-T456-N400*              | 35               | 38.89            | 5                | 5                | 1.00             |
| 15             | F515-Y612*-M408*-S616-D405*-L401*-T456               | 36               | 38.46            | 5                | 5                | 1.00             |
| 16             | L608-F515-Y612*-M408*-S616-D405*-N377-P620-V380      | 37               | 38.21            | 7                | 7                | 1.00             |
| 17             | Y612*-M408*-S616-D405*-L401*-T456-N400*-W491         | 38               | 38.07            | 6                | 6                | 1.00             |
| 18             | P584-L608-F515-Y612*-M408*-S616-D405*-N619*          | 39               | 37.89            | 6                | 5                | 0.83             |
| 19             | Y612*-M408*-S616-D405*-N619*-L457*-Y623              | 40               | 37.80            | 5                | 4                | 0.80             |
| 20             | P584-L608-F515-Y612*-M408*-S616-D405*-S453           | 43               | 37.31            | 6                | 5                | 0.83             |
| 21             | Y612*-M408*-S616-D405*-N619*-N615-D578*-F539         | 44               | 37.26            | 6                | 6                | 1.00             |
| 22             | M582-F539-D578*-N615-N619*-D405*-N377                | 46               | 36.21            | 5                | 5                | 1.00             |
| 23             | M582-F539-D578*-N615-N619*-D405*-N377-P620           | 49               | 35.60            | 6                | 6                | 1.00             |
| 24             | Y612*-M408*-S616-D405*-N619*-N615-T577               | 50               | 35.16            | 5                | 5                | 1.00             |
| 25             | F515-Y612*-M408*-S616-D405*-L401*-T456-N400*         | 51               | 35.11            | 6                | 6                | 1.00             |
| 26             | Y612*-M408*-S616-D405*-N619*-L457*-Y623-Y546*        | 55               | 34.39            | 6                | 5                | 0.83             |
| 27             | F515-Y612*-M408*-S616-D405*-L401*-T456-N400*-W491    | 56               | 34.37            | 7                | 7                | 1.00             |
| 28             | P584-L608-F515-Y612*-M408*-S616-D405*-N619*-L457*    | 59               | 33.90            | 7                | 6                | 0.86             |
| 29             | Y612*-M408*-S616-D405*-L401*-T456-N400*-L452*        | 60               | 33.84            | 6                | 6                | 1.00             |
| 30             | F515-Y612*-M408*-S616-D405*-N619*-N615-D578*-F539    | 61               | 33.57            | 7                | 4                | 0.57             |
| 31             | F515-Y612*-M408*-S616-D405*-N619*-L457*-Y623         | 62               | 33.51            | 6                | 3                | 0.50             |
| 32             | F588-L608-F515-Y612*-M408*-S616-D405*                | 65               | 33.18            | 5                | 5                | 1.00             |
| 33             | F588-L608-F515-Y612*-M408*-S616-D405*-N619*          | 66               | 33.17            | 6                | 6                | 1.00             |
| 34             | P584-L608-F515-Y612*-M408*-S616-D405*-N377-P620-V380 | 67               | 32.97            | 8                | 7                | 0.88             |
| 35             | A589-L532-S586-M582-F539-D578*-L574                  | 68               | 32.84            | 5                | 5                | 1.00             |
| 36             | F588-L608-F515-Y612*-M408*-S616-D405*-N377           | 69               | 32.81            | 6                | 6                | 1.00             |
| 37             | F588-L608-F515-Y612*-M408*-S616-D405*-N377-P620      | 71               | 32.59            | 7                | 7                | 1.00             |
| 38             | Y612*-M408*-S616-D405*-N619*-L457*-Y623-Y546*-M571   | 72               | 32.54            | 7                | 6                | 0.86             |
| 39             | I585-Y612*-M408*-S616-D405*-N377-P620                | 73               | 32.46            | 5                | 5                | 1.00             |
| 40             | F515-Y612*-M408*-S616-D405*-L401*-L457*              | 74               | 32.33            | 5                | 5                | 1.00             |
| 41             | Y612*-M408*-S616-D405*-L401*-T456-N400*-L452*-A404   | 76               | 32.21            | 7                | 7                | 1.00             |
| 42             | F515-Y612*-M408*-S616-D405*-N377-F406                | 79               | 31.59            | 5                | 5                | 1.00             |
| 43             | F515-Y612*-M408*-S616-D405*-N377-S402                | 83               | 30.87            | 5                | 5                | 1.00             |
| 44             | F515-Y612*-M408*-S616-D405*-L401*-T456-N400*-L452*   | 84               | 30.66            | 7                | 7                | 1.00             |
| 45             | F588-L608-F515-Y612*-M408*-S616-D405*-N619*-L457*    | 86               | 30.38            | 7                | 7                | 1.00             |
| 46             | F515-Y612*-M408*-S616-D405*-N619*-L457*-Y623-Y546*   | 87               | 30.33            | 7                | 2                | 0.29             |
| 47             | Y612*-M408*-S616-D405*-N619*-L457*-Y623-Y546*-T461   | 88               | 30.28            | 7                | 7                | 1.00             |

See the legend to Table S1.

**Table S3.** Frequent intramolecular communication paths in the D578<sup>(6.44)</sup>H trajectory.

| # <sup>a</sup> | Path <sup>b</sup>                                            | Rnk <sup>c</sup> | Frq <sup>d</sup> | Len <sup>e</sup> | Crr <sup>f</sup> | Scr <sup>g</sup> |
|----------------|--------------------------------------------------------------|------------------|------------------|------------------|------------------|------------------|
| 1              | Y612*-M408-S616-D405*-N377-P620-V380                         | 9                | 56.46            | 5.00             | 5                | 1.00             |
| 2              | I531-E451-N535*-H578*-N615*-N619*-D405*                      | 13               | 51.54            | 5.00             | 5                | 1.00             |
| 3              | I531-E451-N535*-H578*-N615*-N619*-D405*-N377                 | 16               | 49.39            | 6.00             | 5                | 0.83             |
| 4              | T446-M408-S616-D405*-N377-P620-V380                          | 18               | 46.85            | 5.00             | 5                | 1.00             |
| 5              | Y527*-I531-E451-N535*-H578*-N615*-N619*                      | 20               | 46.16            | 5.00             | 4                | 0.80             |
| 6              | P501-Y527*-I531-E451-N535*-H578*-F539*                       | 21               | 46.09            | 5.00             | 4                | 0.80             |
| 7              | P501-Y527*-I531-E451-N535*-H578*-N615*-N619*                 | 22               | 45.91            | 6.00             | 3                | 0.50             |
| 8              | I531-E451-N535*-H578*-N615*-N619*-L401*                      | 23               | 45.25            | 5.00             | 5                | 1.00             |
| 9              | P516-Y527*-I531-E451-N535*-H578*-F539*                       | 25               | 43.16            | 5.00             | 4                | 0.80             |
| 10             | P516-Y527*-I531-E451-N535*-H578*-N615*-N619*                 | 26               | 42.7             | 6.00             | 3                | 0.50             |
| 11             | I531-E451-N535*-H578*-N615*-N619*-L457*                      | 27               | 42.54            | 5.00             | 3                | 0.60             |
| 12             | I531-E451-N535*-H578*-N615*-N619*-D405*-N377-P620            | 29               | 40.24            | 7.00             | 6                | 0.86             |
| 13             | I531-E451-N535*-Y612*-M408-S616-D405*                        | 31               | 39.49            | 5.00             | 4                | 0.80             |
| 14             | Y527*-I531-E451-N535*-H578*-N615*-N619*-D405*                | 32               | 39.46            | 6.00             | 6                | 1.00             |
| 15             | P501-Y527*-I531-E451-N535*-H578*-N615*-N619*-D405*           | 34               | 38.99            | 7.00             | 5                | 0.71             |
| 16             | I531-E451-N535*-H578*-N615*-N619*-D405*-N377-P620-V380       | 36               | 38.54            | 8.00             | 7                | 0.88             |
| 17             | Y508-P501-Y527*-I531-E451-N535*-H578*-F539*                  | 37               | 38.21            | 6.00             | 5                | 0.83             |
| 18             | Y527*-I531-E451-N535*-H578*-N615*-N619*-D405*-N377           | 38               | 37.94            | 7.00             | 6                | 0.86             |
| 19             | I531-E451-N535*-Y612*-M408-S616-D405*-N377                   | 39               | 37.91            | 6.00             | 4                | 0.67             |
| 20             | Y508-P501-Y527*-I531-E451-N535*-H578*-N615*-N619*            | 40               | 37.61            | 7.00             | 4                | 0.57             |
| 21             | P501-Y527*-I531-E451-N535*-H578*-N615*-N619*-D405*-N377      | 41               | 37.48            | 8.00             | 5                | 0.62             |
| 22             | I531-E451-N535*-H578*-N615*-N619*-D405*-S453                 | 42               | 37.47            | 6.00             | 4                | 0.67             |
| 23             | Y527*-I531-E451-N535*-H578*-N615*-N619*-L401*                | 47               | 36.39            | 6.00             | 6                | 1.00             |
| 24             | P501-Y527*-I531-E451-N535*-H578*-N615*-N619*-L401*           | 48               | 35.77            | 7.00             | 5                | 0.71             |
| 25             | L500-Y527*-I531-E451-N535*-H578*-F539*                       | 56               | 34.17            | 5.00             | 4                | 0.80             |
| 26             | P516-Y527*-I531-E451-N535*-H578*-N615*-N619*-D405*           | 57               | 34.06            | 7.00             | 5                | 0.71             |
| 27             | L500-Y527*-I531-E451-N535*-H578*-N615*-N619*                 | 58               | 34               | 6.00             | 2                | 0.33             |
| 28             | Y527*-I531-E451-N535*-H578*-N615*-N619*-L457*                | 59               | 33.94            | 6.00             | 4                | 0.67             |
| 29             | P501-Y527*-I531-E451-N535*-H578*-N615*-N619*-L457*           | 60               | 33.78            | 7.00             | 4                | 0.57             |
| 30             | P516-Y527*-I531-E451-N535*-H578*-N615*-N619*-D405*-N377      | 62               | 32.67            | 8.00             | 5                | 0.62             |
| 31             | P516-Y527*-I531-E451-N535*-H578*-N615*-N619*-L401*           | 63               | 32.6             | 7.00             | 5                | 0.71             |
| 32             | Y612*-M408-S616-D405*-N377-P620-V380-I625                    | 66               | 32.49            | 6.00             | 6                | 1.00             |
| 33             | Y508-P501-Y527*-I531-E451-N535*-V454                         | 68               | 32.27            | 5.00             | 5                | 1.00             |
| 34             | S506-Y527*-I531-E451-N535*-H578*-F539*                       | 70               | 32.12            | 5.00             | 4                | 0.80             |
| 35             | S506-Y527*-I531-E451-N535*-H578*-N615*-N619*                 | 71               | 32.02            | 6.00             | 3                | 0.50             |
| 36             | Y527*-I531-E451-N535*-H578*-N615*-N619*-D405*-N377-P620      | 74               | 31.61            | 8.00             | 7                | 0.88             |
| 37             | P516-Y527*-I531-E451-N535*-H578*-N615*-N619*-L457*           | 75               | 31.43            | 7.00             | 4                | 0.57             |
| 38             | P501-Y527*-I531-E451-N535*-H578*-N615*-N619*-D405*-N377-P620 | 76               | 31.26            | 9.00             | 6                | 0.67             |
| 39             | Y612*-H578*-N615*-N619*-L401*-T456-N400*                     | 78               | 31.08            | 5.00             | 5                | 1.00             |
| 40             | T446-M408-S616-D405*-N377-P620-V380-I625                     | 79               | 31.07            | 6.00             | 6                | 1.00             |
| 41             | I531-E451-N535*-Y612*-M408-S616-D405*-N377-P620              | 80               | 30.8             | 7.00             | 5                | 0.71             |
| 42             | M582-F539*-H578*-N615*-N619*-D405*-N377                      | 81               | 30.68            | 5.00             | 5                | 1.00             |
| 43             | I531-E451-N535*-Y612*-M408-S616-D405*-S453                   | 82               | 30.58            | 6.00             | 5                | 0.83             |
| 44             | Y527*-I531-E451-N535*-Y612*-M408-S616-D405*                  | 85               | 30.41            | 6.00             | 5                | 0.83             |
| 45             | Y612*-H578*-N615*-N619*-L401*-T456-N400*-M487                | 86               | 30.24            | 6.00             | 5                | 0.83             |
| 46             | P501-Y527*-I531-E451-N535*-Y612*-M408-S616-D405*             | 88               | 30.13            | 7.00             | 5                | 0.71             |
| 47             | Y527*-I531-E451-N535*-H578*-N615*-N619*-D405*-N377-P620-V380 | 89               | 30.12            | 9.00             | 8                | 0.89             |

See the legend to Table S1.

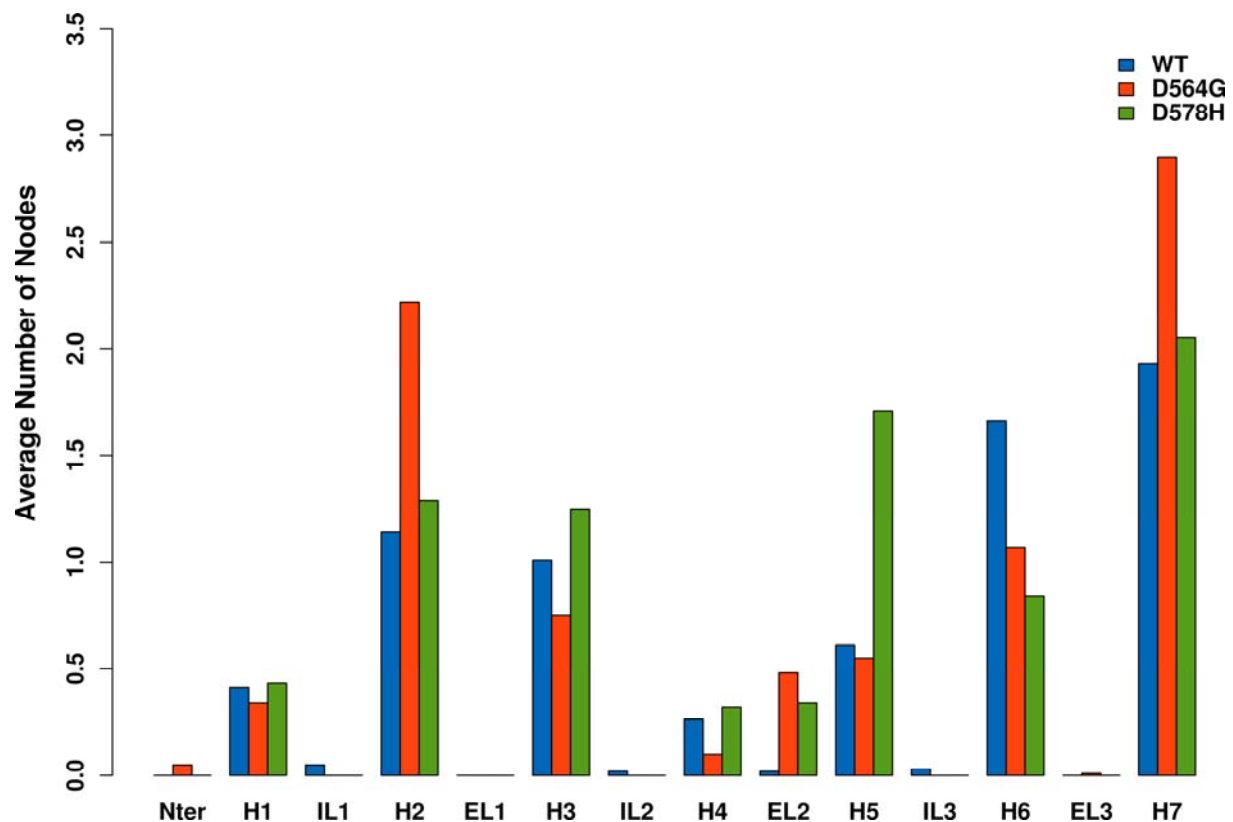

**Figure S1. Helix contribution to the communication paths.** The average number of residues contributed by each receptor portion to the shortest communication paths is plotted. It has been obtained by dividing the total number of amino acids contributed by each receptor portion by the total number of paths with frequency  $\geq 10$  and length  $\geq 3$ . The wild type, D564<sup>(6.30)</sup>G and D578<sup>(6.44)</sup>H forms are indicated, respectively, by blue, red, and green histograms.

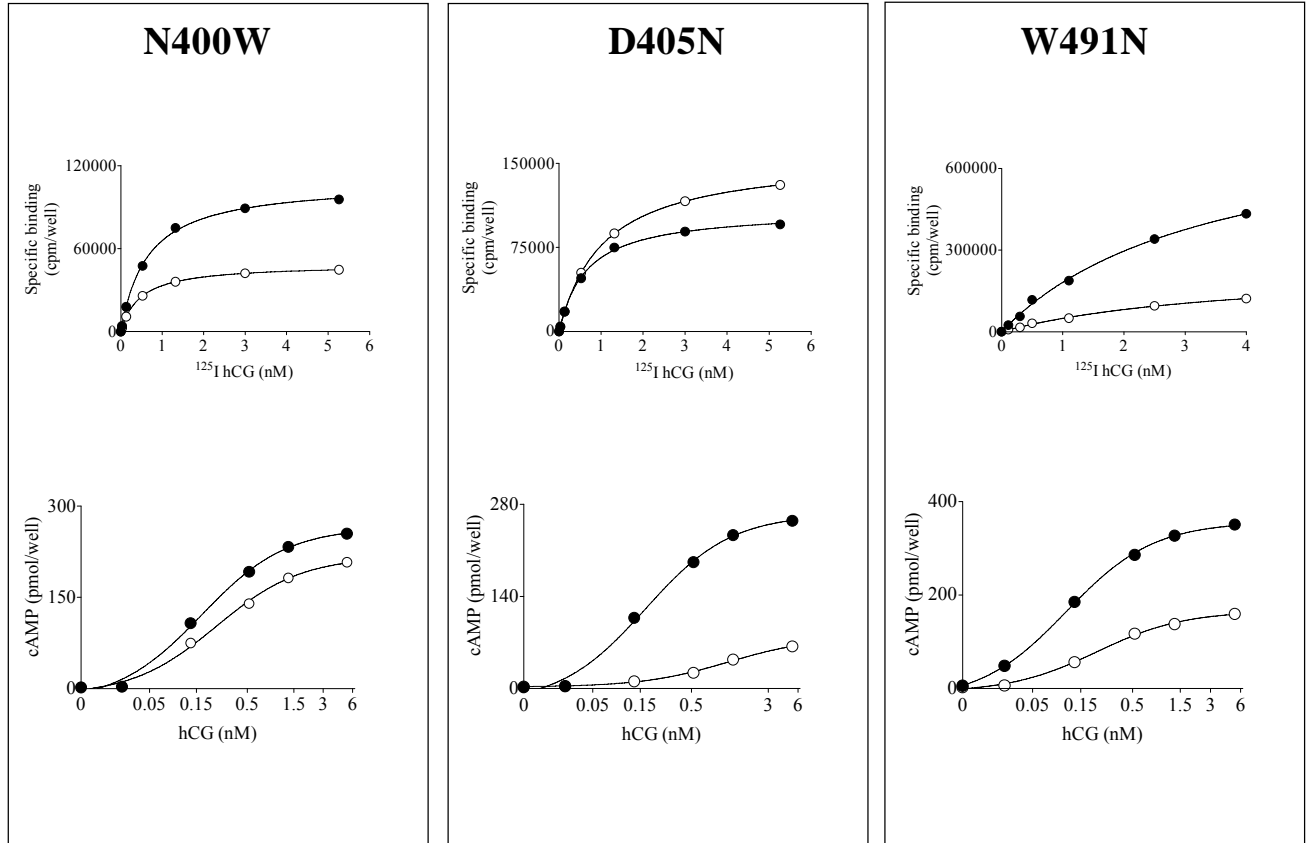

**Figure S2.** Representative saturation binding curves and hCG-mediated cAMP responses for wild type LHR (closed circles) and different single mutants (open circles): N400<sup>(2.45)</sup>W and D405<sup>(2.50)</sup>N, and W491<sup>(4.50)</sup>N.

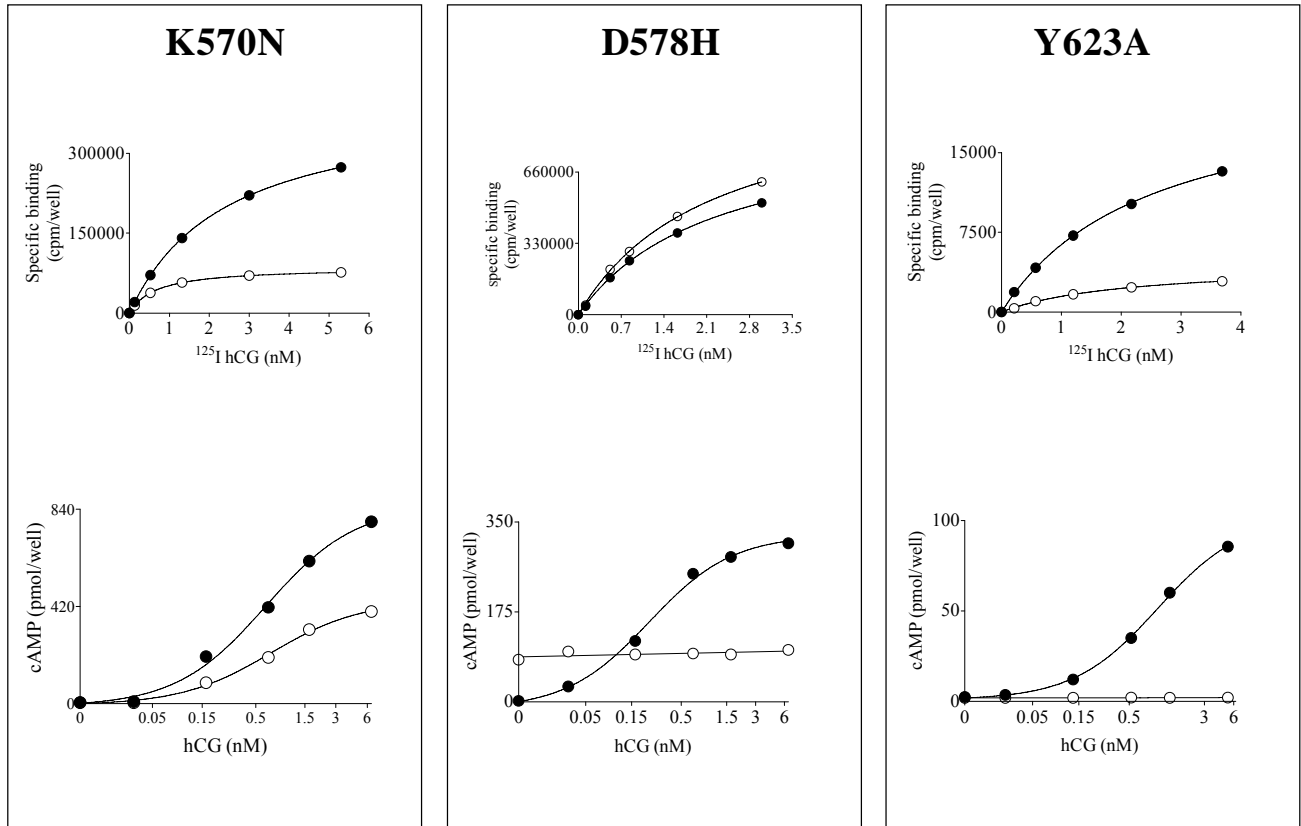

**Figure S3.** Representative saturation binding curves and hCG-mediated cAMP responses for wild type LHR (closed circles) and different single mutants (open circles): K570<sup>(6.36)</sup>N and D578<sup>(6.44)</sup>H and Y623<sup>(7.53)</sup>A.

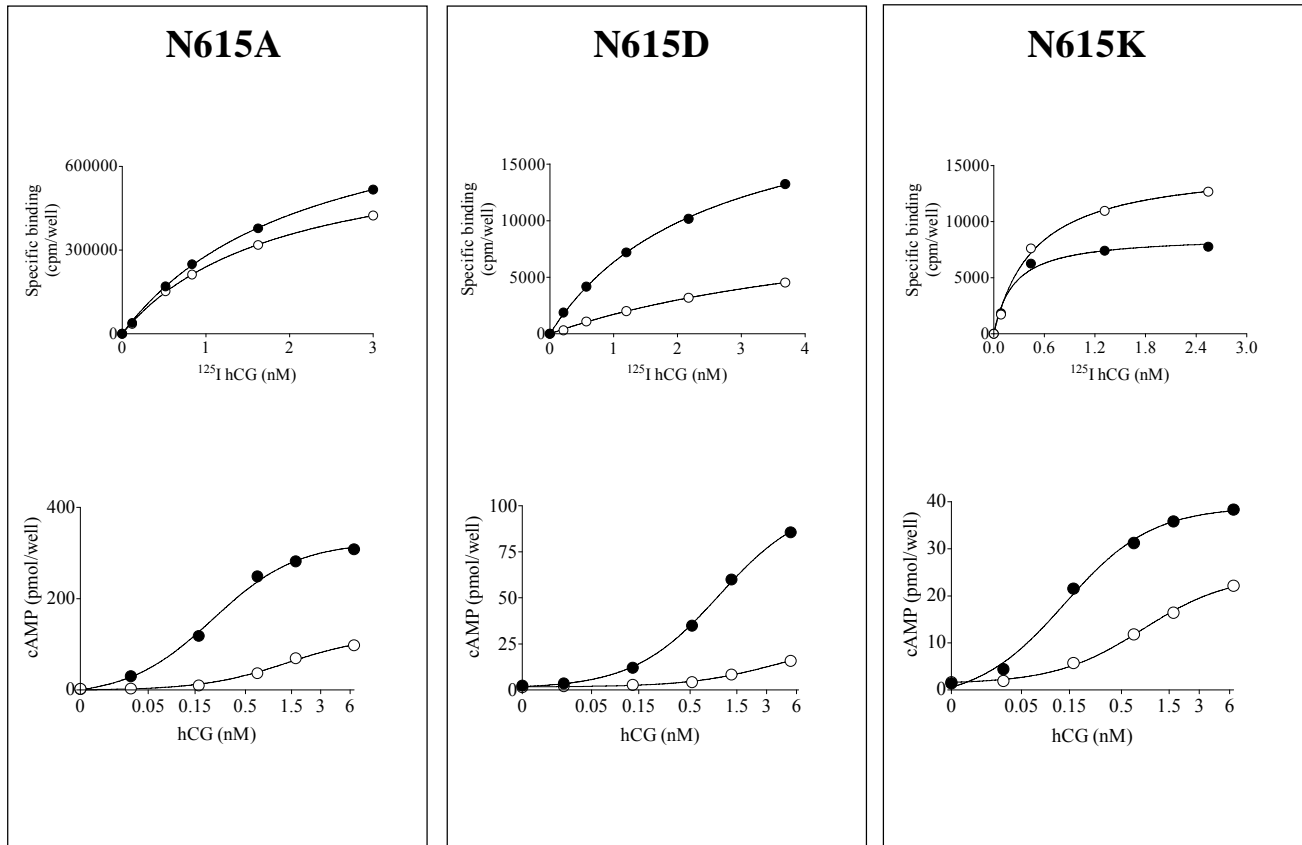

**Figure S4.** Representative saturation binding curves and hCG-mediated cAMP responses for wild type LHR (closed circles) and different single mutants (open circles) of N615<sup>(7,45)</sup>.

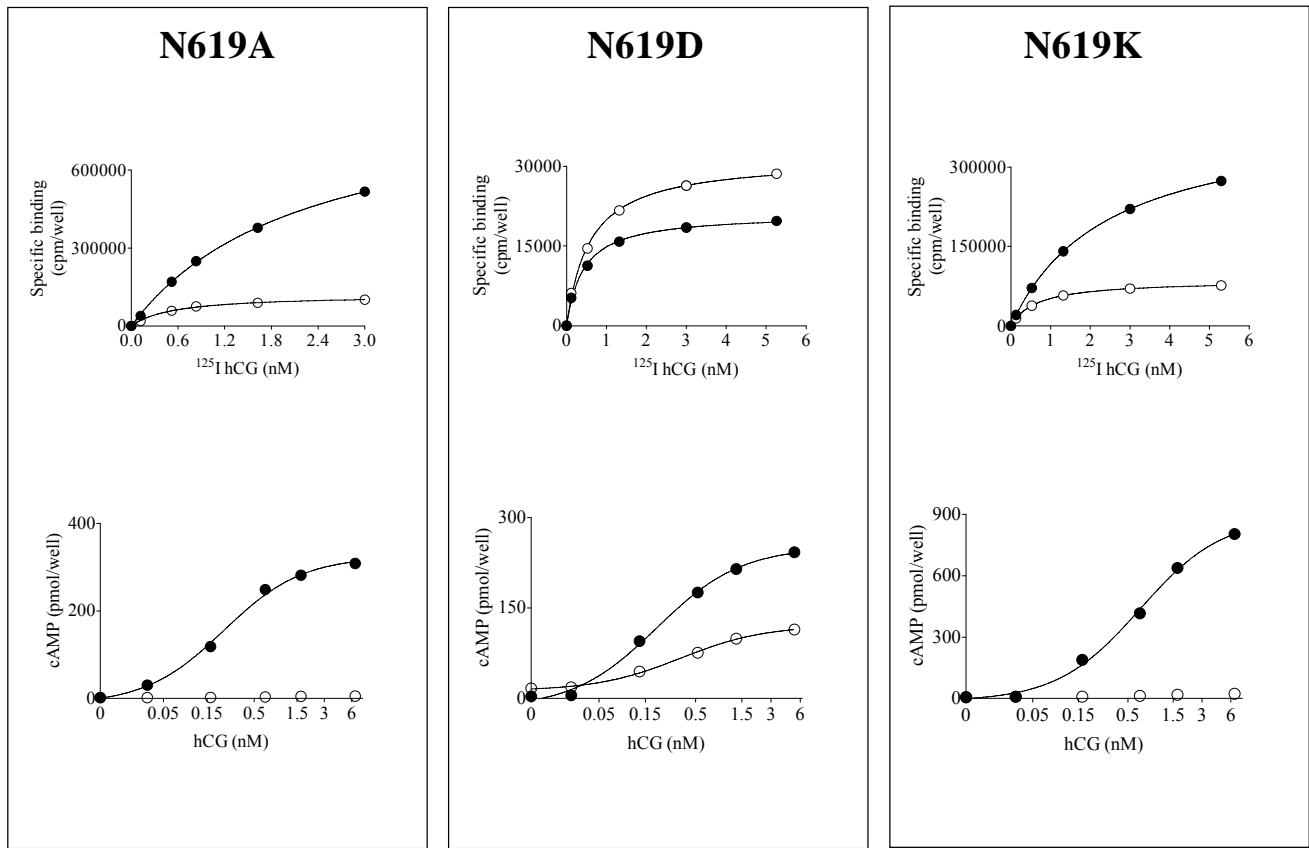

**Figure S5 .** Representative saturation binding curves and hCG-mediated cAMP responses for wild type LHR (closed circles) and different single mutants (open circles) of N619<sup>(7,49)</sup>.



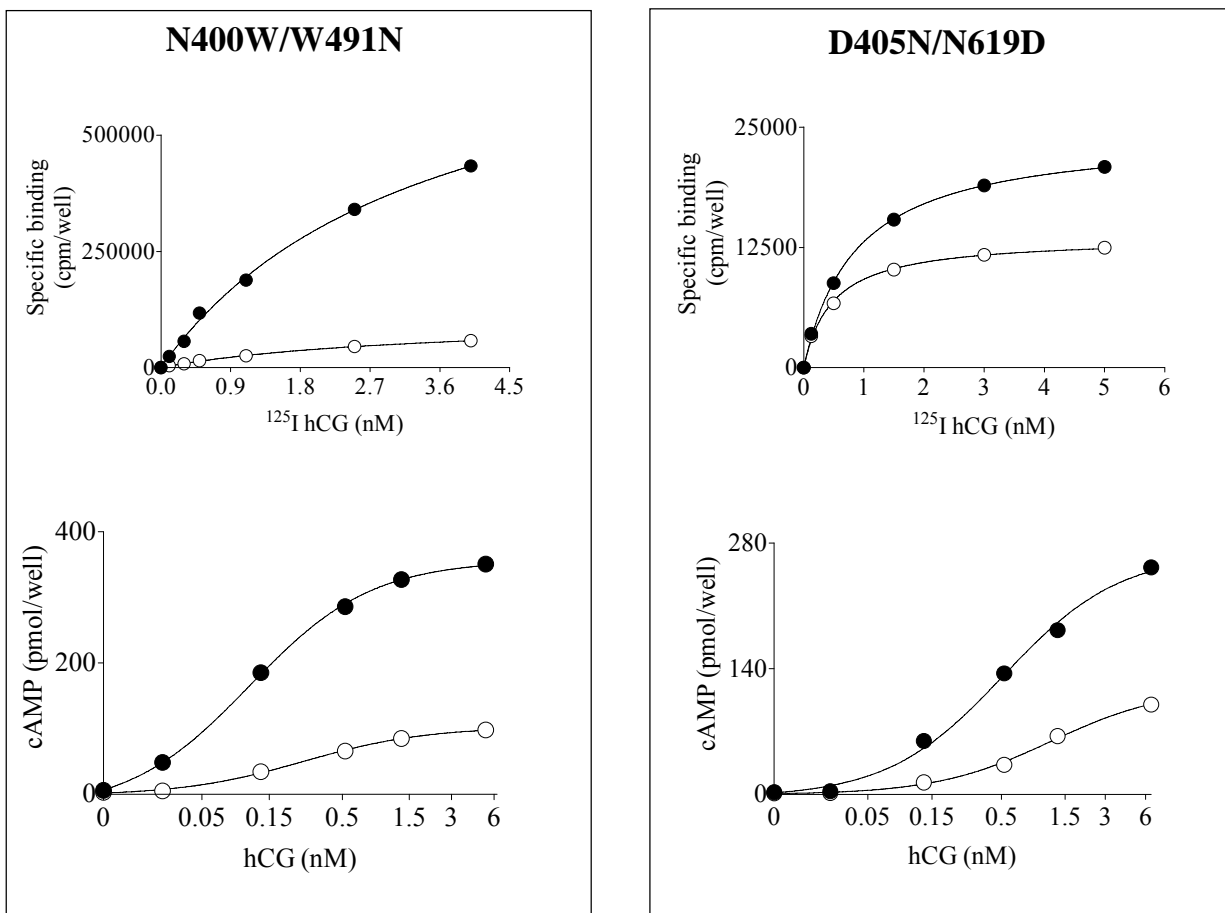

**Figure S6.** Representative saturation binding curves and hCG-mediated cAMP responses for wild type LHR (closed circles) and two double mutants (open circles): N400<sup>(2.45)</sup>W paired with W491<sup>(4.50)</sup>N and D405<sup>(2.50)</sup>N paired with N619<sup>(7.49)</sup>D.

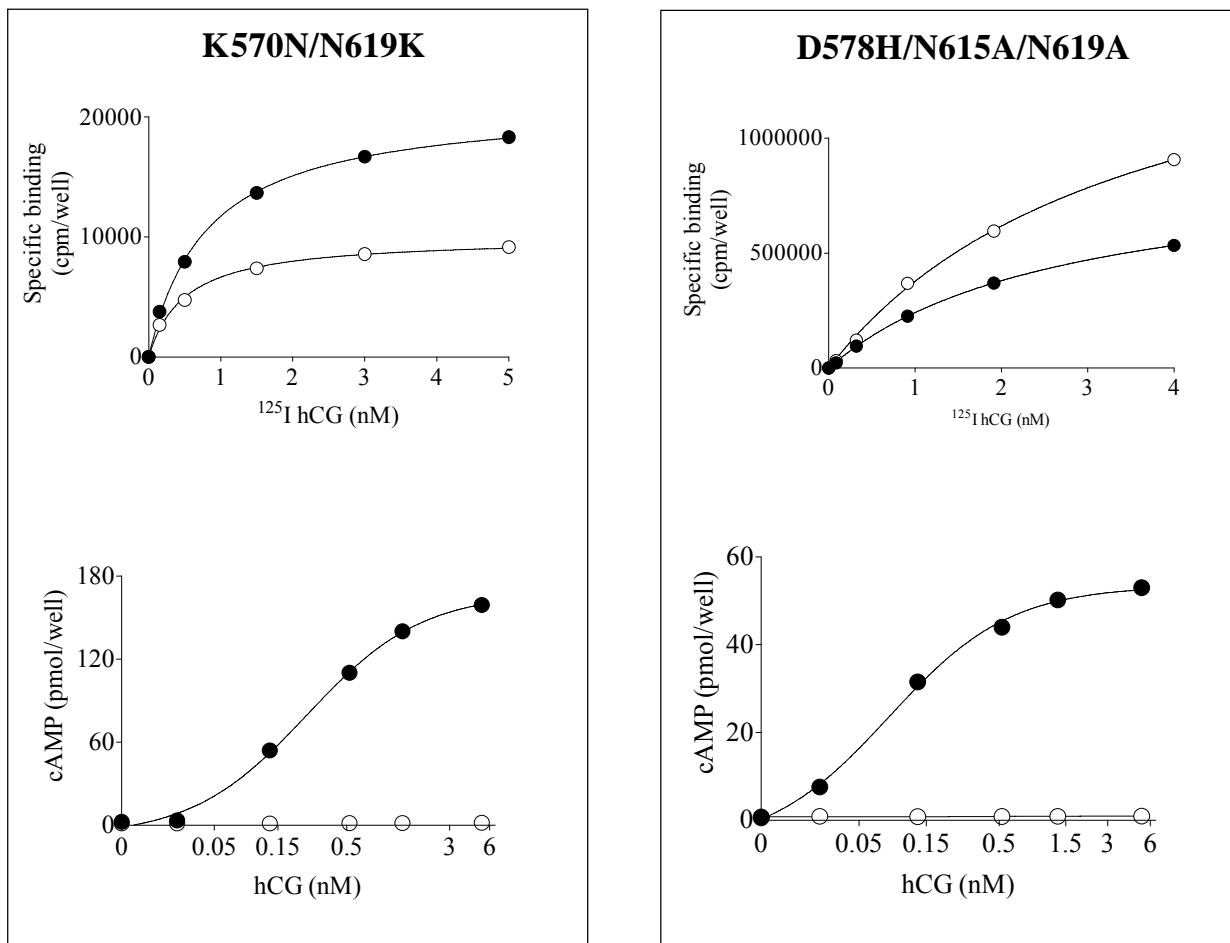

**Figure S7.** Representative saturation binding curves and hCG-mediated cAMP responses for wild type LHR (closed circles) and double and triple mutants (open circles): K570<sup>(6,36)</sup>N paired with N619<sup>(7,49)</sup>K, and D578<sup>(6,44)</sup>H paired with N615<sup>(7,45)</sup>A and N619<sup>(7,49)</sup>A.
